# Supplementary material for: Reconstruction of genetically identified neurons imaged by serial-section electron microscopy
Source: eLife journal article supplement (doi:10.7554/elife.15015), 2016-07-07
Supplement: supp [file elife-15015-supp-v1.zip]

Archive with 9 entries (9 files):
- elife_poa_e15015_Fiigure_1_figure_supplement_2.pdf
- elife_poa_e15015_Fiigure_1_figure_supplement_4.pdf
- elife_poa_e15015_Supplementary_File_2.xlsx
- elife_poa_e15015_Fiigure_1_figure_supplement_3.pdf
- elife_poa_e15015_Figure_1_figure_supplement_1.pdf
- elife_poa_e15015_Supplementary_File_4.docx
- elife_poa_e15015_Supplementary_File_3.xlsx
- elife_poa_e15015_Supplementary_File_1.docx
- elife_poa_e15015_Fiigure_1_figure_supplement_5.pdf
