# Supplementary material for: Reconstruction of genetically identified neurons imaged by serial-section electron microscopy
Source: eLife journal article supplement (doi:10.7554/elife.15015), 2016-07-07
Supplement: supp [file elife-15015-supp-v1.zip › elife_poa_e15015_Supplementary_File_2.xlsx]

## Sheet: Sheet1
Supplementary File 2
Reduced rOTO Protocol
Step	Solution	Duration [min]	Temperature [˚C]
1st Day
Dissection	Oxygenated AMES medium (95% O2, 5% CO2)		22
Fixation	2.5 %(w/v) Glutaraldehyde 2 %(w/v) PFA in 0.15 M Sodium Cacodylate buffer, pH 7.4 with 3 mM CaCl2	30	4
Fixation	2 %(w/v) Glutaraldehyde in 0.15 M Sodum Cacodylate buffer, pH 7.4 with 3 mM CaCl2	150	4
Extended Wash	0.15 M Sodium Cacodylate buffer, pH 7.4 with 3 mM CaCl2 - 5 exchanges	60	22
DAB incubation	10 mg DAB in 40ml 0.15 M Sodium Cacodylate buffer, pH 7.4 with 3 mM CaCl2	60	22
DAB reaction	10 mg DAB in 40ml 0.15 M Sodium Cacodylate buffer with 0.03%(w/v) H2O2, pH 7.4 with 3 mM CaCl2	120	22
Extended Wash	0.15 M Sodium Cacodylate buffer, pH 7.4 with 3 mM CaCl2 - 5 exchanges	60	22
Reduction	0.8 %(w/v) Sodium Hydrosulfite in 60%(v/v) 0.1 M Sodium Bicarbonate 40 %(v/v) 0.1 M Sodium Carbonate buffer with 3 mM CaCl2	20	22
Wash, 3 exchanges	0.15 M Sodium Cacodylate buffer, pH 7.4 with 3 mM CaCl2	15	22
Osmication	1.5 %(w/v) Potassium Ferrocyanide 1%(w/v) OsO4 in .15M Sodium Cacodylate buffer with 3 mM CaCl2	60	22
Wash, 5 exchanges	0.15 M Sodium Cacodylate buffer, pH 7.4 with 3 mM CaCl2	30	22
TCH	1 %(w/v) Thiocarbohydrazide in ddH2O	20	22
Wash, 5 exchanges	ddH2O	30	22
Osmication	2 %(w/v) OsO4 in ddH2O	60	22
Wash, 5 exchanges	0.05 M Sodium Maleate buffer, pH 5.15	30	22
en bloc UA	1 %(w/v) Uranyl Acetate in Sodium Maleate Buffer	over night	22
2nd day
Dehydration	20 %(v/v) Ethanol, 80 %(v/v) H2O	15	4
Dehydration	50 %(v/v) Ethanol, 50 %(v/v) H2O	15	4
Dehydration	70 %(v/v) Ethanol, 30 %(v/v) H2O	15	4
Dehydration	90 %(v/v) Ethanol, 10 %(v/v) H2O	15	4
Dehydration	100 % Ethanol	15	4
Dehydration	100 % Ethanol	15	4
Dehydration	100 % Acetone	15	4
Infiltration	100 % Acetone	15	22
Infiltration	75 %(v/v) Acetone 25 %(v/v) Durcupan Resin	120	22
Infiltration	50 %(v/v) Acetone 50 %(v/v) Durcupan Resin	120	22
Infiltration	25 %(v/v) Acetone 75 %(v/v) Durcupan Resin	120	22
Infiltration	100 % Durcupan Resin	120	22
Embedding	100 % Durcupan Resin	120	22
Embedding	Cure in oven	2 days	60
