# Supplementary figures and images for: Reconstruction of genetically identified neurons imaged by serial-section electron microscopy
Source: eLife journal article supplement (doi:10.7554/elife.15015), 2016-07-07

Figure 1 - Suppl. Fig.5

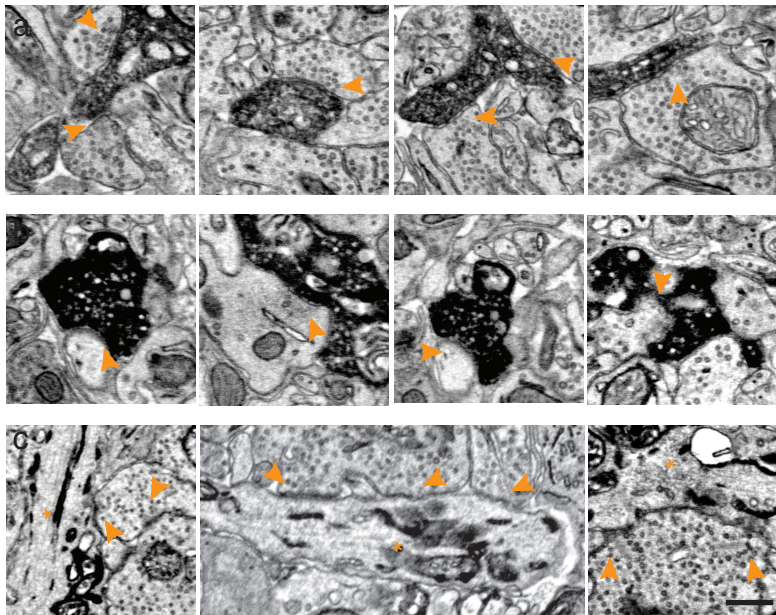

Supplement: supp [file elife-15015-supp-v1.zip]

Figure 1 - Suppl. Fig.1

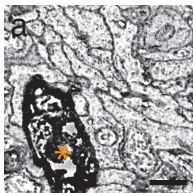

Standard

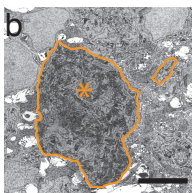

Reduced

Osmium

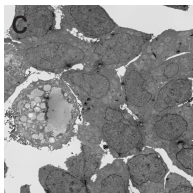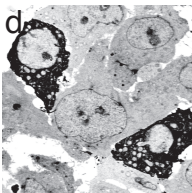

rOTO

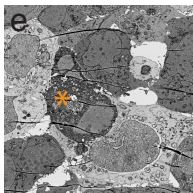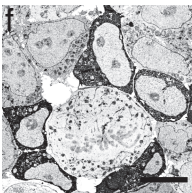

Standard

Reduced

bright-field

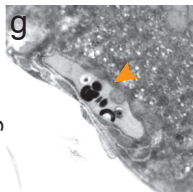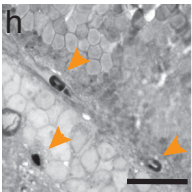

rOTO

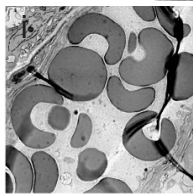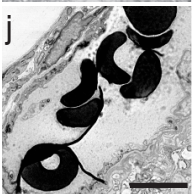

Supplement: supp [file elife-15015-supp-v1.zip]

Figure 1 - Suppl. Figure 3

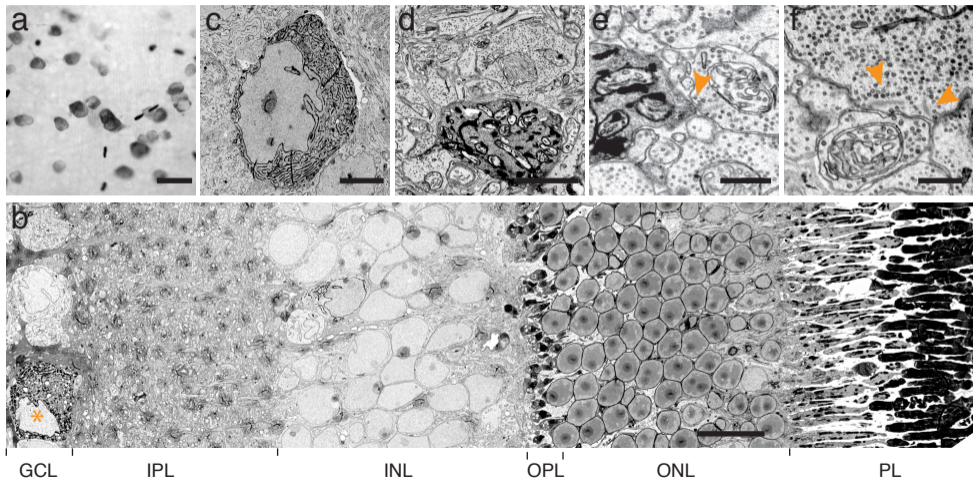

Supplement: supp [file elife-15015-supp-v1.zip]

Figure 1 - Suppl. Figure 2

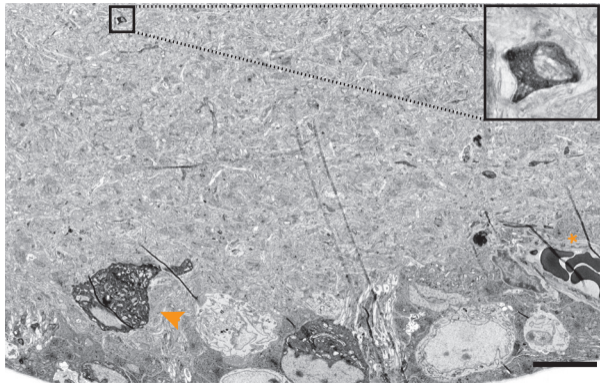

Supplement: supp [file elife-15015-supp-v1.zip]

Figure 1 - Suppl. Fig.4

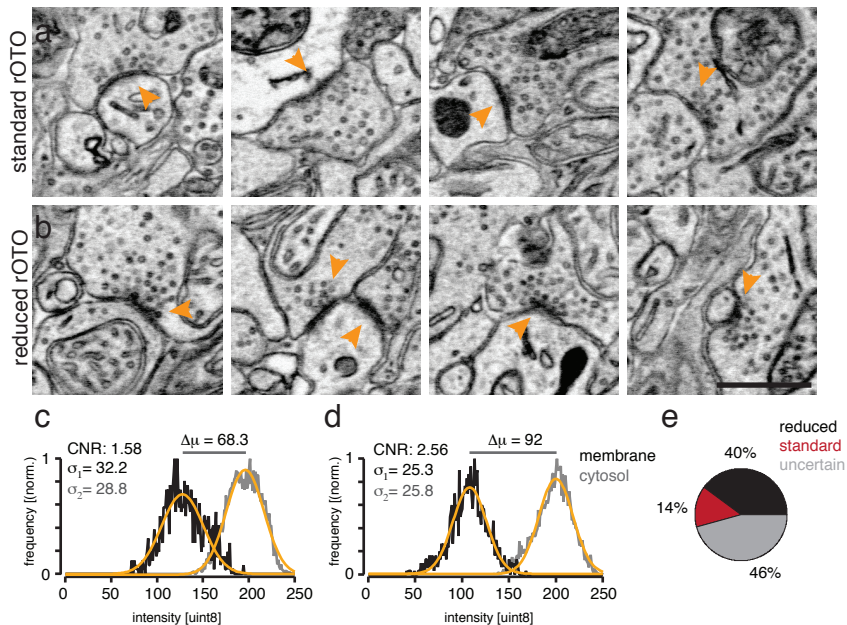

Supplement: supp [file elife-15015-supp-v1.zip]
